# Supplementary material for: Gold nanocages covered with thermally-responsive polymers for controlled release by high-intensity focused ultrasound
Source: Royal Society of Chemistry journal article supplement (doi:10.1039/c0nr00932f), 2011-01-01
Supplement: c0nr00932f.pdf [file c0nr00932f.pdf]

## Supporting Information

### Gold Nanocages Covered with Thermally-responsive Polymers for Controlled Release by High-intensity Focused Ultrasound\*\*

Weiyang Li<sup>†,a</sup>, Xin Cai<sup>†,a</sup>, Chulhong Kim<sup>†,a,b</sup>, Guorong Sun<sup>a</sup>, Yu Zhang<sup>a</sup>, Rui Deng<sup>a</sup>,  
Miaoxin Yang<sup>a</sup>, Jingyi Chen<sup>a</sup>, Samuel Achilefu<sup>c</sup>, Lihong V. Wang<sup>\*,a</sup>, and Younan Xia<sup>\*,a</sup>

<sup>a</sup>*Department of Biomedical Engineering, Washington University, St. Louis, Missouri 63130*

<sup>b</sup>*Current address: Department of Biomedical Engineering, The State University of New York,  
Buffalo, NY 14260*

<sup>c</sup>*Department of Radiology, Washington University School of Medicine, St. Louis, MO 63110*

*\*Corresponding authors. E-mail: xia@biomed.wustl.edu (for nanocage and polymer syntheses)  
and lhwang@biomed.wustl.edu (for high-intensity focused ultrasound experiments)*

<sup>†</sup>Weiyang Li, Xin Cai, and Chulhong Kim contributed equally to this work.

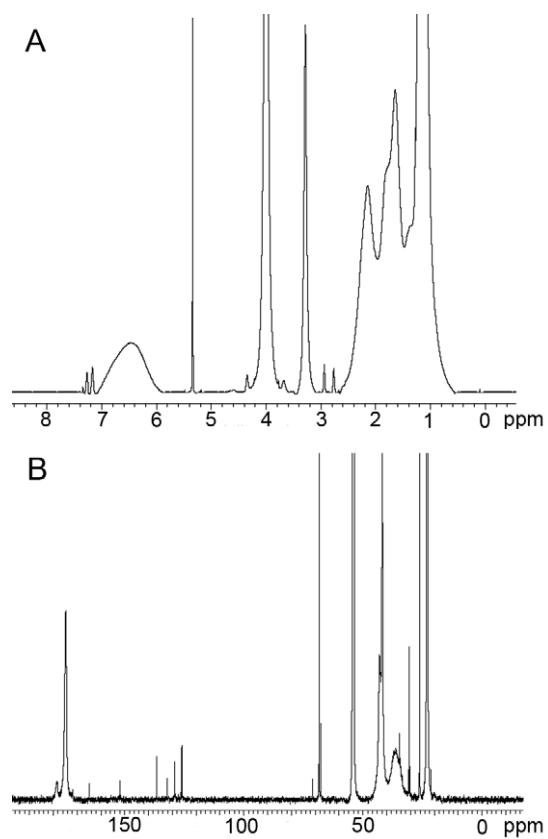

**Figure S1.** (A)  $^1\text{H}$ -NMR and (B) quantitative  $^{13}\text{C}$  NMR spectra of the as-prepared poly(NIPAAm-*co*-AAm) copolymers.

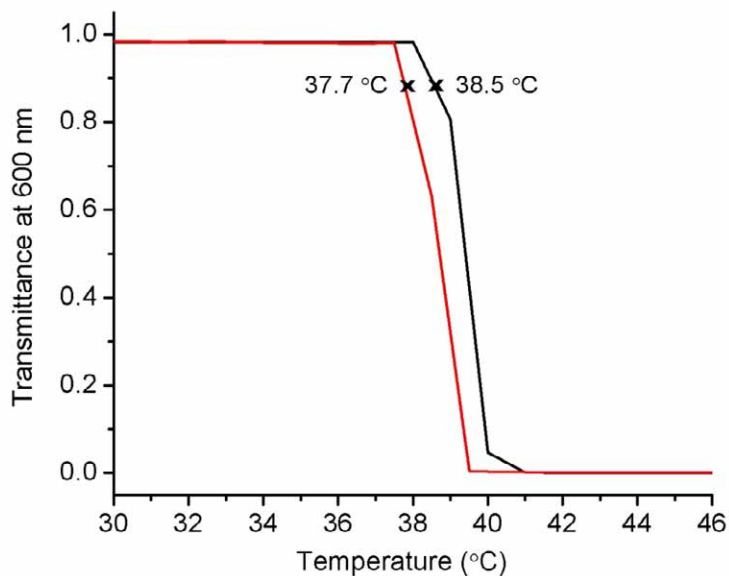

**Figure S2.** The LCST measured spectrophotometrically, with the solution being heated at a rate of 1.0 °C/min. The measurement was conducted in water (black line) and PBS buffer solution (red line), respectively. The temperature at 90% light transmittance (at 600 nm) of the original polymer solution was defined as the LCST.

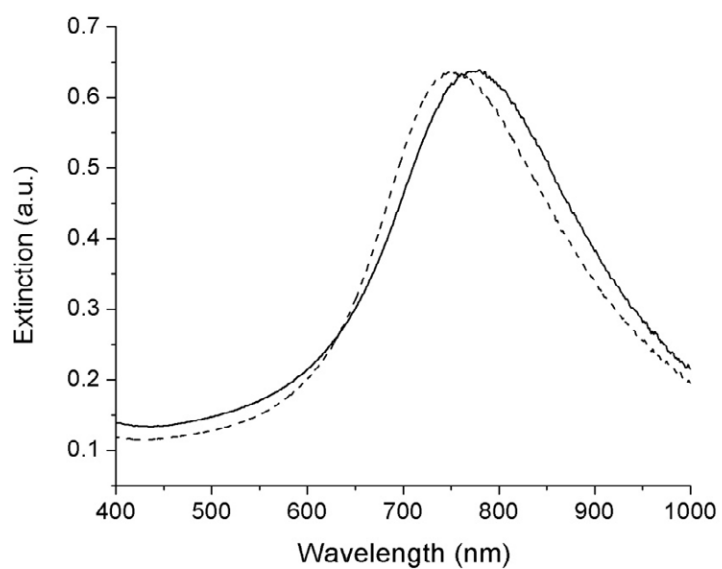

**Figure S3.** UV-vis extinction spectra of an aqueous suspension of Au nanocages before (dashed line) and after functionalization with poly(NIPAAm-*co*-AAm) copolymers (solid line).

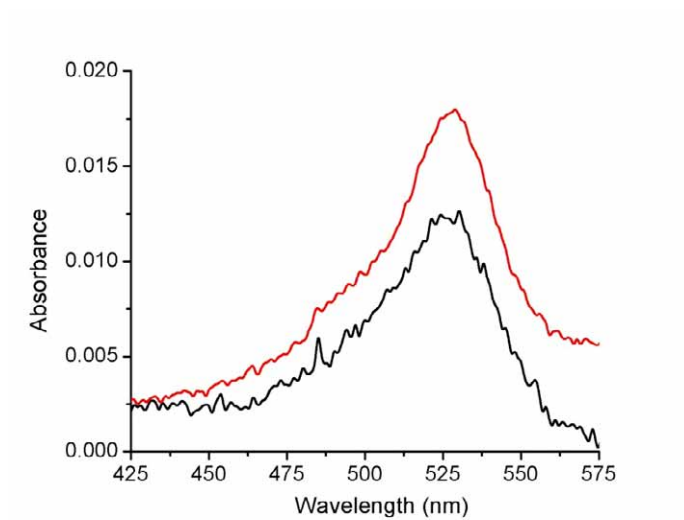

**Figure S4.** UV-vis absorption spectra taken from the supernatant immediately after preparation of the dye-loaded nanocages (black line) and after the sample had been heated at 37 °C for 48 h (red line).

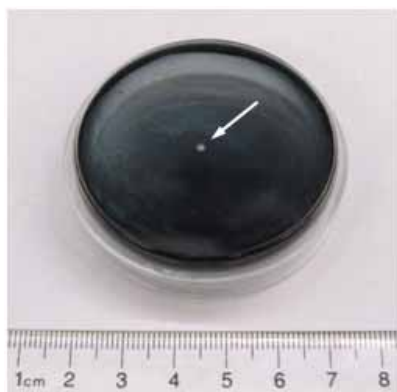

**Figure S5.** Photograph showing the white spot, indicated by the white arrow, on the bottom surface of the petri dish after HIFU irradiation at a power of 15 W for 5 seconds.
